# Supplementary material for: Effect of concurrent training on trainability performance factors in youth elite golf players
Source: PeerJ. 2020 Sep 16;8:e9963. doi: 10.7717/peerj.9963 (PMC7501780; doi:10.7717/peerj.9963)
Supplement: Supplemental Information 1 [file peerj-08-9963-s001.xls]

## Sheet: RESULTS
Group	Athlete	Bodymass_1	Bodymass_2	Bodymass_3	Bodyfat_1	Bodyfat_2	Bodyfat_3	Muclemass_1	Muclemass_2	Muclemass_3	PT-CT_2	PT-CT_3	TL-G_2	TL-G_3	GMS_1	GMS_2	GMS_3	CMJ_1	CMJ_2	CMJ_3	Wmax_1	Wmax_2	Wmax_3	Sball_1	Sball_2	Sball_3	Age_1	Age_2	Age_3	PHV_1	PHV_2	PHV_3	HEIGHT_1	HEIGHT_2	HEIGHT_3
0	DEP_1	66.5	68	69	11.06	10.48	9.36	47.03	48.33	48.47	355.625	85	218.75	221.667	20	18	17	36.2	37.3	37.8	726	774	835	255	259	258	16.405	16.688	17.14	1.434	1.651	1.876	178	179	179
1	DEP_10	65.1	66.5	67.2	8.21	8.66	9.42	49.96	50.12	50.06	321.667	75	221.667	233.333	11	6	4	36.6	38.2	39.5	1004	1165	1264	256	261	261	17.463	17.745	18.197	2.135	2.17	2.38	179	179	179
1	DEP_11	68	71.3	72.1	10.35	11.8	12.08	49.21	49.08	48.85	319.583	75	218.75	221.667	12	10	8	47.4	48.8	50.7	1084	1207	1302	260	263	263	16.564	16.847	17.301	1.418	1.604	1.814	177	177	177
1	DEP_12	69.1	71.3	71.7	14.26	13.91	12.81	44.61	44.84	45.06	325.521	90	210	210	18	10	6	35.2	37.1	39.3	1268	1333	1411	259	261	261	16.548	16.83	17.282	0.916	1.055	1.264	177	178	178.5
1	DEP_13	76.9	75.2	75.9	13.14	12.89	10.83	47.53	47.98	48.47	323.333	75	210	210	13	7	4	32.3	34.7	37.1	994	1105	1289	255	258	262	17.392	17.674	18.126	1.708	1.811	2.019	187	187	187
1	DEP_14	58.5	60.6	61.1	8.15	8.2	7.28	46.26	47.32	47.86	329.688	77.5	207.084	198.333	22	10	7	41.7	42.7	44.2	945	1090	1150	253	260	260	16.233	16.515	16.967	1.294	1.453	1.672	178	178	178
0	DEP_17	72.4	73.3	73.6	8.05	8.14	7.42	52.5	52.61	52.72	354.792	87.5	215.833	221.667	6	5	4	36.4	38.7	40.2	992	1078	1103	253	256	256	17.43	17.712	18.164	2.655	2.806	3.04	173.5	174	174
0	DEP_18	71.7	71.4	71.7	12.76	11.11	10.77	48.47	48.57	48.86	347.917	90	207.084	215.833	10	9	7	42.3	45.6	43.6	1362	1386	1400	253	255	257	17.718	18	18.452	2.648	2.859	3.141	172.5	173	173
1	DEP_19	91.5	92.8	92.8	14.8	14.27	14.16	46.24	46.33	46.46	315.417	90	210	210	7	6	5	36.32	38.9	36.1	1092	1174	1232	267	267	269	16.901	17.184	17.638	1.624	1.765	1.966	183	183	183
0	DEP_2	71.8	73.8	73.8	8.42	8.36	8.54	48.06	48.4	48.51	345	87.5	212.916	210	11	9	7	49.8	50.4	50.9	1116	1180	1208	252	254	254	16.427	16.71	17.164	2.144	2.306	2.538	172.5	173.5	173.5
1	DEP_20	52.9	54.5	54.7	12.18	11.85	10.43	44.7	45.1	46.3	336.042	90	207.084	210	6	4	5	32.5	33.8	39.6	762	850	910	219	221	223	17.312	17.595	18.047	3.54	3.688	3.922	162	162	162
0	DEP_3	63.3	65.2	65.7	13.92	14.51	14.63	46.85	46.92	47.01	350.938	90	207.084	210	9	5	5	41.3	45.7	46.2	780	809	824	250	251	253	16.715	16.997	17.452	2.036	2.281	2.51	172	172.5	172.5
0	DEP_4	89.2	88.7	90.3	9.1	9.81	9.75	49.72	49.8	50.02	343.125	85	201.25	192.5	14	10	8	34.1	36	35.6	853	881	894	254	260	260	15.901	16.184	16.636	1.154	1.272	1.492	183	183	183
0	DEP_5	67.1	66.8	66.5	9.1	9.47	9.75	46.45	46.38	46.61	345.417	95	204.167	198.333	7	5	5	38.6	40.5	40.3	1006	1084	1190	259	260	261	17.293	17.575	18.03	1.321	1.419	1.618	177	177	177
0	DEP_6	70.5	70.8	71.1	11.17	11.07	10.68	47.16	47.22	47.25	349.688	105	212.916	210	12	9	8	42.5	42.8	43.7	886	895	937	277	273	275	17.608	17.89	18.342	3.168	3.323	3.568	175	175	175
1	DEP_9	57	59.9	60.6	10.29	10.8	11.09	46.41	46.65	46.71	329.271	77.5	212.916	215.833	19	15	8	34.5	36.1	40.5	793	892	990	238	245	245	15.858	16.14	16.592	1.303	1.479	1.705	173	173	173.5

## Sheet: TL-G
				FMAX			70		min	FEXPL			70			FVEL			70			FMAX			70		min	FEXPL			70			FVEL			70
Group	Athlete	TL-G_2	TL-G_3	week_1	week_2	week_3	week_4	week_5	week_6	week_7	week_8	week_9	week_10	week_11	week_12	week_13	week_14	week_15	week_16	week_17	week_18	Total-w_1	Total-w_2	Total-w_3	Total-w_4	Total-w_5	Total-w_6	Total-w_7	Total-w_8	Total-w_9	Total-w_10	Total-w_11	Total-w_12	Total-w_13	Total-w_14	Total-w_15	Total-w_16	Total-w_17	Total-w_18
0	DEP_1	218.75	221.667	3	2.5	3.5	3	3	4	3	3.5	3	3	3	3	3.5	3	3	3.5	3	3	210	175	245	210	210	280	210	245	210	210	210	210	245	210	210	245	210	210
1	DEP_10	221.667	233.333	3	3	4	3	3	3	3	4	3	3	3	3	4	3	3	4	3	3	210	210	280	210	210	210	210	280	210	210	210	210	280	210	210	280	210	210
1	DEP_11	218.75	221.667	3	2.5	4	2.5	3	4	3	4	2.5	3	3	3	4	2.5	3	4	2.5	3	210	175	280	175	210	280	210	280	175	210	210	210	280	175	210	280	175	210
1	DEP_12	210	210	3	3	3	3	3	3	3	3	3	3	3	3	3	3	3	3	3	3	210	210	210	210	210	210	210	210	210	210	210	210	210	210	210	210	210	210
1	DEP_13	210	210	3	3	3	3	3	3	3	3	3	3	3	3	3	3	3	3	3	3	210	210	210	210	210	210	210	210	210	210	210	210	210	210	210	210	210	210
1	DEP_14	207.083	198.333	3	2.5	3	2.5	3	4	3	3	2.5	3	3	3	3	2.5	3	3	2.5	3	210	175	210	175	210	280	210	210	175	210	210	210	210	175	210	210	175	210
0	DEP_17	215.833	221.667	3	3	3.5	3	3	3	3	3.5	3	3	3	3	3.5	3	3	3.5	3	3	210	210	245	210	210	210	210	245	210	210	210	210	245	210	210	245	210	210
0	DEP_18	207.083	215.833	2.5	3	4	2.5	2.5	3	3	4	2.5	3	2.5	3	4	2.5	3	4	2.5	2.5	175	210	280	175	175	210	210	280	175	210	175	210	280	175	210	280	175	175
1	DEP_19	210	210	3	3	3	3	3	3	3	3	3	3	3	3	3	3	3	3	3	3	210	210	210	210	210	210	210	210	210	210	210	210	210	210	210	210	210	210
0	DEP_2	212.917	210	3	2.5	3	3	3	4	3	3	3	3	3	3	3	3	3	3	3	3	210	175	210	210	210	280	210	210	210	210	210	210	210	210	210	210	210	210
1	DEP_20	207.083	210	3	2.5	3	3	3	3	3	3	3	3	3	3	3	3	3	3	3	3	210	175	210	210	210	210	210	210	210	210	210	210	210	210	210	210	210	210
0	DEP_3	207.083	210	3	2.5	3	3	3	3	3	3	3	3	3	3	3	3	3	3	3	3	210	175	210	210	210	210	210	210	210	210	210	210	210	210	210	210	210	210
0	DEP_4	201.25	192.5	2.5	3	3	2.5	2.5	4	3	3	2.5	3	2.5	3	3	2.5	3	3	2.5	2.5	175	210	210	175	175	280	210	210	175	210	175	210	210	175	210	210	175	175
0	DEP_5	204.167	198.333	3	3	3	2.5	3	3	3	3	2.5	3	3	3	3	2.5	3	3	2.5	3	210	210	210	175	210	210	210	210	175	210	210	210	210	175	210	210	175	210
0	DEP_6	212.917	210	3	2.5	3	3	3	4	3	3	3	3	3	3	3	3	3	3	3	3	210	175	210	210	210	280	210	210	210	210	210	210	210	210	210	210	210	210
1	DEP_9	212.917	215.833	2.5	3	3.5	3	2.5	4	3	3.5	3	3	2.5	3	3.5	3	3	3.5	3	2.5	175	210	245	210	175	280	210	245	210	210	175	210	245	210	210	245	210	175

## Sheet: TL-CT
		FEXPL	FVEL	FMAX			45		min	FEXPL			50			FVEL			30			FMAX			45		min	FEXPL			50			FVEL			30
Group	Athlete	TL-CT_2	TL-CT_3	week_1	week_2	week_3	week_4	week_5	week_6	week_7	week_8	week_9	week_10	week_11	week_12	week_13	week_14	week_15	week_16	week_17	week_18	Total-w_1	Total-w_2	Total-w_3	Total-w_4	Total-w_5	Total-w_6	Total-w_7	Total-w_8	Total-w_9	Total-w_10	Total-w_11	Total-w_12	Total-w_13	Total-w_14	Total-w_15	Total-w_16	Total-w_17	Total-w_18
0	DEP_1	355.625	85	4.5	7.5	7.25	8.25	8.5	8	7.5	7.5	7.25	7.5	8	8	3	3	3	2.5	3	2.5	202.5	337.5	326.25	371.25	382.5	360	375	375	362.5	375	400	400	90	90	90	75	90	75
1	DEP_10	321.667	75	4	6	6.5	7	7.25	7.25	7	7	7	7.25	7.25	7.5	2.5	2.5	2.5	2.5	2.5	2.5	180	270	292.5	315	326.25	326.25	350	350	350	362.5	362.5	375	75	75	75	75	75	75
1	DEP_11	319.583	90	4.25	6	6.5	7	7.25	7	7	7.25	7	7	7	7.25	3	3	3	3	3	3	191.25	270	292.5	315	326.25	315	350	362.5	350	350	350	362.5	90	90	90	90	90	90
1	DEP_12	325.521	75	4	6.25	6.5	7.25	7.5	7.25	7	7	7.5	7	7.25	7.5	2.5	2.5	2.5	2.5	2.5	2.5	180	281.25	292.5	326.25	337.5	326.25	350	350	375	350	362.5	375	75	75	75	75	75	75
1	DEP_13	323.333	90	4	6.5	6.5	7.25	7.5	7.25	6.5	7	7.25	7.5	7.25	7	3	3	3	3	3	3	180	292.5	292.5	326.25	337.5	326.25	325	350	362.5	375	362.5	350	90	90	90	90	90	90
1	DEP_14	329.688	75	4	7	7.25	8	8	7	6.5	7	7	7.25	7	7.25	2.5	2.5	2.5	2.5	2.5	2.5	180	315	326.25	360	360	315	325	350	350	362.5	350	362.5	75	75	75	75	75	75
0	DEP_17	354.792	87.5	4	7.25	7.5	8.25	8.5	8	7.5	8	7.5	7.5	7.5	8	2.5	3	3	3	3	3	180	326.25	337.5	371.25	382.5	360	375	400	375	375	375	400	75	90	90	90	90	90
0	DEP_18	347.917	90	4.25	7	7	8	8.25	8	7.5	7.5	8	7.5	7.5	7.25	3	3	3	3	3	3	191.25	315	315	360	371.25	360	375	375	400	375	375	362.5	90	90	90	90	90	90
1	DEP_19	315.417	90	4	6	6.25	7	7.5	7.25	6	7	7	7.25	7.25	7	3	3	3	3	3	3	180	270	281.25	315	337.5	326.25	300	350	350	362.5	362.5	350	90	90	90	90	90	90
0	DEP_2	345	87.5	4.5	7	7	8	8	7.5	7.5	8	7.5	7.25	7.25	7.5	3	3	2.5	3	3	3	202.5	315	315	360	360	337.5	375	400	375	362.5	362.5	375	90	90	75	90	90	90
1	DEP_20	336.042	77.5	5	7	7	7.5	7.5	7	7	7.25	7.5	7.25	7.25	7.5	3	2.5	2.5	2.5	2.5	2.5	225	315	315	337.5	337.5	315	350	362.5	375	362.5	362.5	375	90	75	75	75	75	75
0	DEP_3	350.938	90	4.25	7	7.25	8	8.25	8	7.25	7.5	7.5	8	8	7.5	3	3	3	3	3	3	191.25	315	326.25	360	371.25	360	362.5	375	375	400	400	375	90	90	90	90	90	90
0	DEP_4	343.125	85	4.25	7	7.25	8	7.5	7.5	7	7.5	7.5	7.5	8	7.5	2.5	3	2.5	3	3	3	191.25	315	326.25	360	337.5	337.5	350	375	375	375	400	375	75	90	75	90	90	90
0	DEP_5	345.417	95	5.25	7.25	7.5	8	8	7.5	7	7.5	7	7.25	7.5	7.5	3.5	3	3	3.5	3	3	236.25	326.25	337.5	360	360	337.5	350	375	350	362.5	375	375	105	90	90	105	90	90
0	DEP_6	349.688	105	4	7	7.25	8.5	8.5	8	7	7.5	7.5	7.5	7.5	8	3.5	3.5	3.5	3.5	3.5	3.5	180	315	326.25	382.5	382.5	360	350	375	375	375	375	400	105	105	105	105	105	105
1	DEP_9	329.271	77.5	5	6.5	6.25	7.5	7.5	7	6.5	7	7.25	7.5	7.5	7.5	3	2.5	2.5	2.5	2.5	2.5	225	292.5	281.25	337.5	337.5	315	325	350	362.5	375	375	375	90	75	75	75	75	75
