# Supplementary material for: Effect of concurrent training on trainability performance factors in youth elite golf players
Source: PeerJ. 2020 Sep 16;8:e9963. doi: 10.7717/peerj.9963 (PMC7501780; doi:10.7717/peerj.9963)
Supplement: Supplemental Information 2 [file peerj-08-9963-s002.xlsx]

## Sheet: Code
Variable	Code
Group	0: After golf group
	1: Before golf group
